# Supplementary material
Source: HighWire-hosted journal article supplement (https://www.cmaj.ca/highwire/filestream/74453/field_highwire_adjunct_files/0/190747-res-1-at.pdf)

## Appendix 1 (as supplied by the authors): Supplementary materials

Table A1: Research Ethics Board Approvals

| #                                                    | Institution Name                                |
|------------------------------------------------------|-------------------------------------------------|
| <b>Teaching Sites</b>                                |                                                 |
| 1                                                    | Sunnybrook Health Sciences Centre               |
| 2                                                    | University Health Network: Toronto General Site |
| 3                                                    | University Health Network: Toronto Western Site |
| <b>Large sites (&gt; 200 AF visits / year)</b>       |                                                 |
| 4                                                    | Lakeridge Health Corporation: Oshawa Site       |
| 5                                                    | Trillium Health Centre: Mississauga Site        |
| 6                                                    | Southlake Regional Health Centre                |
| 7                                                    | William Osler Health Centre: Civic Site         |
| 8                                                    | Mackenzie Health                                |
| 9                                                    | Trillium Health Centre: Credit Valley Site      |
| <b>Intermediate sites (100-200 AF visits / year)</b> |                                                 |
| 10                                                   | Markham Stouffville Hospital: Markham Site      |
| 11                                                   | William Osler Health Centre: Etobicoke          |
| 12                                                   | Lakeridge Health Corporation: Bowmanville Site  |
| <b>Small sites (&lt; 100 AF visits / year)</b>       |                                                 |
| 13                                                   | Trillium Health Healthcare: West Toronto        |
| 14                                                   | Markham Stouffville Hospital: Uxbridge Site     |
| 15                                                   | Lakeridge Health Corporation: Port Perry        |

Table A2. Administrative databases used in the study

|                                                                                                                                                                                                                                                                                                                                                                                                                                                                                                                                                                                                                                                      |
|------------------------------------------------------------------------------------------------------------------------------------------------------------------------------------------------------------------------------------------------------------------------------------------------------------------------------------------------------------------------------------------------------------------------------------------------------------------------------------------------------------------------------------------------------------------------------------------------------------------------------------------------------|
| <p>The <b>Canadian Institute for Health Information (CIHI) National Ambulatory Care Reporting System (NACRS)</b> is a Canada-wide dataset that contains over 300 variables pertaining to an emergency department visit. Hospital reporting to NACRS is mandatory in Ontario, thus it includes all emergency department visits made in the province of Ontario. The CIHI databases use the <i>International Classification of Diseases, Version 10 (ICD-10)</i> to code diagnoses.<sup>1</sup></p>                                                                                                                                                    |
| <p>CIHI's <b>Discharge Abstract Database (DAD)</b> includes hospitalizations (up to 25 hospital diagnoses), as well as comorbidities, procedures, and demographic data on all hospitalizations in Ontario. The CIHI databases use the <i>International Classification of Diseases, Version 10 (ICD-10)</i> to code diagnoses.<sup>1</sup></p>                                                                                                                                                                                                                                                                                                        |
| <p>The <b>Ontario Health Insurance Plan (OHIP)</b> holds fee claims made by physicians in any setting (e.g. for the purposes of the current study, hospital, <u>we included</u> office, home, long-term care facility, and phone claims) for medically necessary care.<sup>2</sup></p>                                                                                                                                                                                                                                                                                                                                                               |
| <p>Prescription drug coverage is provided to all Ontarians with a medical card number (OHIP number) age 65 and older, as well as select groups under age 65 years. The <b>Ontario Drug Database (ODB)</b> contains the date of prescription fill, the dose and quantity dispensed for all qualifying Ontarians.<sup>2</sup></p>                                                                                                                                                                                                                                                                                                                      |
| <p>The <b>Registered Persons Database (RPDB)</b> provides demographic and mortality data (including out-of-hospital deaths).<sup>3</sup></p>                                                                                                                                                                                                                                                                                                                                                                                                                                                                                                         |
| <p>The <b>ICES Physician Provider Database</b> holds information about Ontario's physicians, including specialty, age, year of graduation from medical school, etc. It compiles information from several sources, including the Ontario Health Insurance Plan, the Corporate Provider Database (which comes from the Ontario Ministry of Health and Long-Term Care)<sup>4</sup>, and the Ontario Physician Human Resource Data Centre database.<sup>5</sup> The latter performs annual surveys of a random sample of one third of physician offices in Ontario to determine physician specialty, in addition to using other information sources.</p> |

#### References

1. Canadian Institute for Health Information. Canadian Coding Standards for Version 2012, ICD-10-CA and CCI. 2012:5-15. [https://secure.cihi.ca/free\\_products/canadian\\_coding\\_standards\\_2012\\_e.pdf](https://secure.cihi.ca/free_products/canadian_coding_standards_2012_e.pdf). Accessed 12/17/2015.
2. Goel V, Williams JI, Anderson GM, et al. A Summary of studies on the quality of health care administration databases in Canada. Patterns of health care in Ontario: the ICES practice atlas. 2012:339-345. <http://www.ices.on.ca/~media/Files/Atlases-Reports/1996/Patterns-of-health-care-in-Ontario-2nd-edition/Full%20report.ashx>. Accessed Sept 6, 2012.
3. Iron K, Zagorski BM, Sykora K, et al. Living and Dying in Ontario: An Opportunity for Improved Health Information. 2009. [http://www.ices.on.ca/file/Living\\_and\\_dying\\_in\\_Ontario\\_March19-08.pdf](http://www.ices.on.ca/file/Living_and_dying_in_Ontario_March19-08.pdf). Accessed Sept 6, 2012.
4. Ontario e. Provider Registry. 2011. [https://www.ehealthontario.on.ca/images/uploads/pages/documents/ProviderRegistry\\_PIA.pdf](https://www.ehealthontario.on.ca/images/uploads/pages/documents/ProviderRegistry_PIA.pdf). Accessed Feb 28, 2017.
5. OPHRDC. Ontario Physician Human Resources Data Centre. 2014. <https://www.ophrdc.org/Public/Report.aspx?owner=pio>. Accessed Sept 12, 2014.

Table A3. Secondary outcome event ICD-10 codes\*

|                                                                                                                                                                                                                                                                                                         |
|---------------------------------------------------------------------------------------------------------------------------------------------------------------------------------------------------------------------------------------------------------------------------------------------------------|
| <b>Strokes</b>                                                                                                                                                                                                                                                                                          |
| I60-62, I690, I691, I692, I63 (excluding I63.3), I64, H34.1                                                                                                                                                                                                                                             |
| <b>Bleeding events</b>                                                                                                                                                                                                                                                                                  |
| Gastrointestinal: I850, I983, K225, K250/252/254/256, K260/262/264/266, K270/272/274/276, K280/282/284/286, K290, K661, K920, K921, K922<br>Intracranial Hemorrhage: I60, I61, I620, I621, I629<br>Genitourinary: N020-029, R310, R311, R318<br>Respiratory: R040, R041, R042, R048, R049<br>Other: R58 |

\*Hospitalizations with these codes, excluding events that occurred *after* admission (e.g. post-operative)

Table A4. Who prescribed OAC prescriptions in the emergency department

| <b>Prescriber</b>                                                    |              | <b>OAC Prescription Given (%)</b> |  |
|----------------------------------------------------------------------|--------------|-----------------------------------|--|
|                                                                      |              | <b>n=402 (18.9)</b>               |  |
| <b>ED physician</b>                                                  |              |                                   |  |
| ED physician prescribed an OAC                                       |              | 296 (73.6)                        |  |
| ED physician prescribed warfarin                                     |              | 229/296 (77.4)                    |  |
| Number of days                                                       | Median (IQR) | 7 (3-21)                          |  |
| ED physician prescribed Dabigatran                                   |              | 50/296 (16.9)                     |  |
| Number of days                                                       | Median (IQR) | 30 (28-30)                        |  |
| ED physician prescribed Rivaroxaban or Apixaban                      |              | 17/296 (5.7)                      |  |
| Number of days                                                       | Median (IQR) | 30 (26-30)                        |  |
| <b>Consultant physician</b>                                          |              |                                   |  |
| Consultant prescribed OAC, in patients who were seen by a consultant |              | 106/341 (31.2)                    |  |
| Consultant prescribed warfarin                                       |              | 59/106 (55.7)                     |  |
| Consultant prescribed dabigatran                                     |              | 32/106 (30.2)                     |  |
| Consultant prescribed rivaroxaban or apixaban                        |              | 15/106 (14.2)                     |  |
| <b>All ED prescriptions</b>                                          |              |                                   |  |
| ED warfarin prescribed                                               |              | 288 (71.6)                        |  |
| ED dabigatran prescribed                                             |              | 82 (20.4)                         |  |
| ED rivaroxaban or apixaban prescribed                                |              | 32 (8.0)                          |  |
| ED ASA or clopidigrel prescribed                                     |              | 380 (17.8)                        |  |

ED: emergency department; OAC: oral anticoagulant; N/A: not applicable; IQR: Interquartile range; ASA: aspirin

Table A5. Balance between inverse probability of treatment weighted (IPTW) cohorts

| Characteristic                                                          |               | OAC Prescription Given, % | No OAC Prescription Given, % | Standardized difference |
|-------------------------------------------------------------------------|---------------|---------------------------|------------------------------|-------------------------|
| Age                                                                     | Mean $\pm$ SD | 76.5 $\pm$ 15.4           | 76.0 $\pm$ 8.2               | 0.068                   |
|                                                                         | Median (IQR)  | 76.0 (71.0-81.0)          | 75.0 (70.0-81.0)             |                         |
| Sex                                                                     | Female        | 61.8                      | 59.0                         | 0.058                   |
| Rural residence                                                         |               | 2.1                       | 2.1                          | 0.001                   |
| Income quintile                                                         | 1             | 14.1                      | 14.6                         | 0.014                   |
|                                                                         | 2             | 16.7                      | 17.6                         | 0.023                   |
|                                                                         | 3             | 17.8                      | 19.6                         | 0.045                   |
|                                                                         | 4             | 22.2                      | 24.7                         | 0.060                   |
|                                                                         | 5 (highest)   | 29.2                      | 23.5                         | <b>0.129</b>            |
| Came from                                                               | Home          | 70.1                      | 72.9                         | 0.062                   |
|                                                                         | Other*        | 29.9                      | 27.1                         | 0.062                   |
| <b>Past Medical History</b>                                             |               |                           |                              |                         |
| Atrial fibrillation/flutter                                             |               | 24.9                      | 26.6                         | 0.039                   |
| Heart failure                                                           |               | 11.3                      | 10.4                         | 0.027                   |
| Stroke or TIA                                                           |               | 1.2                       | 1.1                          | 0.013                   |
| Coronary artery disease                                                 |               | 17.9                      | 19.5                         | 0.039                   |
| Valvular disease                                                        |               | 1.7                       | 1.7                          | 0.007                   |
| Hypertension                                                            |               | 73.1                      | 75.6                         | 0.057                   |
| COPD                                                                    |               | 7.3                       | 6.1                          | 0.046                   |
| Diabetes Mellitus                                                       |               | 17.6                      | 18.0                         | 0.010                   |
| Renal Failure or dialysis                                               |               | 2.3                       | 1.4                          | 0.063                   |
| Falls                                                                   |               | 3.3                       | 2.0                          | 0.085                   |
| Major bleeding event resulting in hospitalization: GI bleed, ICH, other |               | 5.5                       | 6.6                          | 0.038                   |
| Dementia                                                                |               | 1.9                       | 1.8                          | 0.003                   |
| Smoker                                                                  | Current       | 4.20                      | 3.88                         | 0.017                   |
|                                                                         | Previous      | 5.9                       | 6.6                          | 0.028                   |
|                                                                         | Never         | 89.9                      | 89.5                         | 0.011                   |
| CHADS2                                                                  | 0             | 10.6                      | 10.2                         | 0.015                   |
|                                                                         | 1             | 35.0                      | 36.3                         | 0.027                   |
|                                                                         | 2             | 39.2                      | 38.3                         | 0.018                   |
|                                                                         | 3+            | 15.1                      | 15.2                         | 0.002                   |
| HAS-BLED score 1 or 2 (vs 3)                                            |               | 41.3                      | 44.1                         | 0.058                   |
| <b>Medications on presentation</b>                                      |               |                           |                              |                         |
| Clopidigrel                                                             |               | 3.2                       | 4.4                          | 0.064                   |
| Aspirin                                                                 |               | 37.8                      | 38.7                         | 0.017                   |
| NSAIDs                                                                  |               | 7.0                       | 8.6                          | 0.058                   |

| <b>Emergency Department Care</b> |                |                    |                    |       |
|----------------------------------|----------------|--------------------|--------------------|-------|
| Palpitations                     |                | 48.9               | 52.2               | 0.066 |
| Triage heart rate                | Median (IQR)   | 117.0 (89.0-138.0) | 113.0 (89.0-137.0) | 0.049 |
| Cardioverted                     |                | 46.0               | 47.7               | 0.034 |
| Creatinine > 200 mmol/L          |                | 1.0                | 1.0                | 0.008 |
| Discharge rhythm                 | NSR            | 49.5               | 53.1               | 0.072 |
|                                  | AF             | 44.9               | 41.4               | 0.070 |
|                                  | Other /Unknown | 5.6                | 5.4                | 0.006 |
| Seen by a consultant             |                | 18.0               | 16.7               | 0.035 |

SD: standard deviation; IQR: interquartile range; TIA: Transient ischemic attack; COPD: chronic obstructive pulmonary disease; GI: gastrointestinal; ICH: intracranial hemorrhage; NSAID: non-steroidal anti-inflammatory drug  
 \* doctor's office

Table A6. Mortality and stroke outcomes by emergency department OAC prescription provision, after propensity-score weighting

|                                   | OAC Rx Given | No OAC Rx Given | HR   | 95% CI |       | p     |
|-----------------------------------|--------------|-----------------|------|--------|-------|-------|
| <b>Mortality</b>                  |              |                 |      |        |       |       |
| 180-day                           | 3.1%         | 3.0%            | 1.03 | 0.43   | 2.45  | 0.95  |
| 1-year                            | 5.0%         | 5.0%            | 1.01 | 0.53   | 1.91  | 0.99  |
| 2-year                            | 9.0%         | 8.9%            | 1.02 | 0.65   | 1.61  | 0.93  |
| <b>Hemorrhagic stroke</b>         |              |                 |      |        |       |       |
| 180-day                           | 0.0%         | 0.1%            | 0.00 | 0.00   | 0.00  | 0.99  |
| (Died)                            | (3.1%)       | (2.9%)          |      |        |       |       |
| 1-year                            | 0.3%         | 0.2%            | 1.71 | 0.18   | 16.40 | 0.64  |
| (Died)                            | (5.0%)       | (4.8%)          |      |        |       |       |
| 2-year                            | 0.3%         | 0.2%            | 1.71 | 0.18   | 16.40 | 0.64  |
| (Died)                            | (9.0%)       | (8.7%)          |      |        |       |       |
| <b>Ischemic stroke</b>            |              |                 |      |        |       |       |
| 180-day                           | 1.1%         | 0.6%            | 1.86 | 0.53   | 6.53  | 0.33  |
| (Died)                            | (2.5%)       | (2.9%)          |      |        |       |       |
| 1-year                            | 1.1%         | 0.9%            | 1.28 | 0.39   | 4.27  | 0.69  |
| (Died)                            | (4.5%)       | (4.7%)          |      |        |       |       |
| 2-year                            | 1.3%         | 2.0%            | 0.64 | 0.23   | 1.79  | 0.39  |
| (Died)                            | (8.3%)       | (8.3%)          |      |        |       |       |
| <b>Any stroke<sup>a</sup></b>     |              |                 |      |        |       |       |
| 180-day                           | 1.1%         | 0.7%            | 1.56 | 0.46   | 5.31  | 0.48  |
| (Died)                            | (2.5%)       | (2.9%)          |      |        |       |       |
| 1-year                            | 1.4%         | 1.0%            | 1.35 | 0.47   | 3.91  | 0.58  |
| (Died)                            | (4.5%)       | (4.6%)          |      |        |       |       |
| 2-year                            | 1.6%         | 2.2%            | 0.72 | 0.28   | 1.83  | 0.49  |
| (Died)                            | (8.3%)       | (8.1%)          |      |        |       |       |
| <b>Bleeding event<sup>a</sup></b> |              |                 |      |        |       |       |
| 180-day                           | 1.2%         | 0.47%           | 2.51 | 0.80   | 7.92  | 0.12  |
| (Died)                            | (3.1%)       | (2.9%)          |      |        |       |       |
| 1-year                            | 1.9%         | 1.0%            | 1.89 | 0.78   | 4.55  | 0.16  |
| (Died)                            | (4.8%)       | (4.8%)          |      |        |       |       |
| 2-year                            | 2.5%         | 1.7%            | 1.46 | 0.72   | 2.95  | 0.297 |
| (Died)                            | (3.1%)       | (2.9%)          |      |        |       |       |

OAC: oral anticoagulant; Rx: prescription; HR: hazard ratio; CI: confidence intervals

<sup>a</sup> See Table A3, above, for codes

Figure A1. In patients who filled a first OAC prescription post-ED visit, unadjusted time to discontinuation (i.e. a 30 day gap) by group within 365 days after first prescription fill

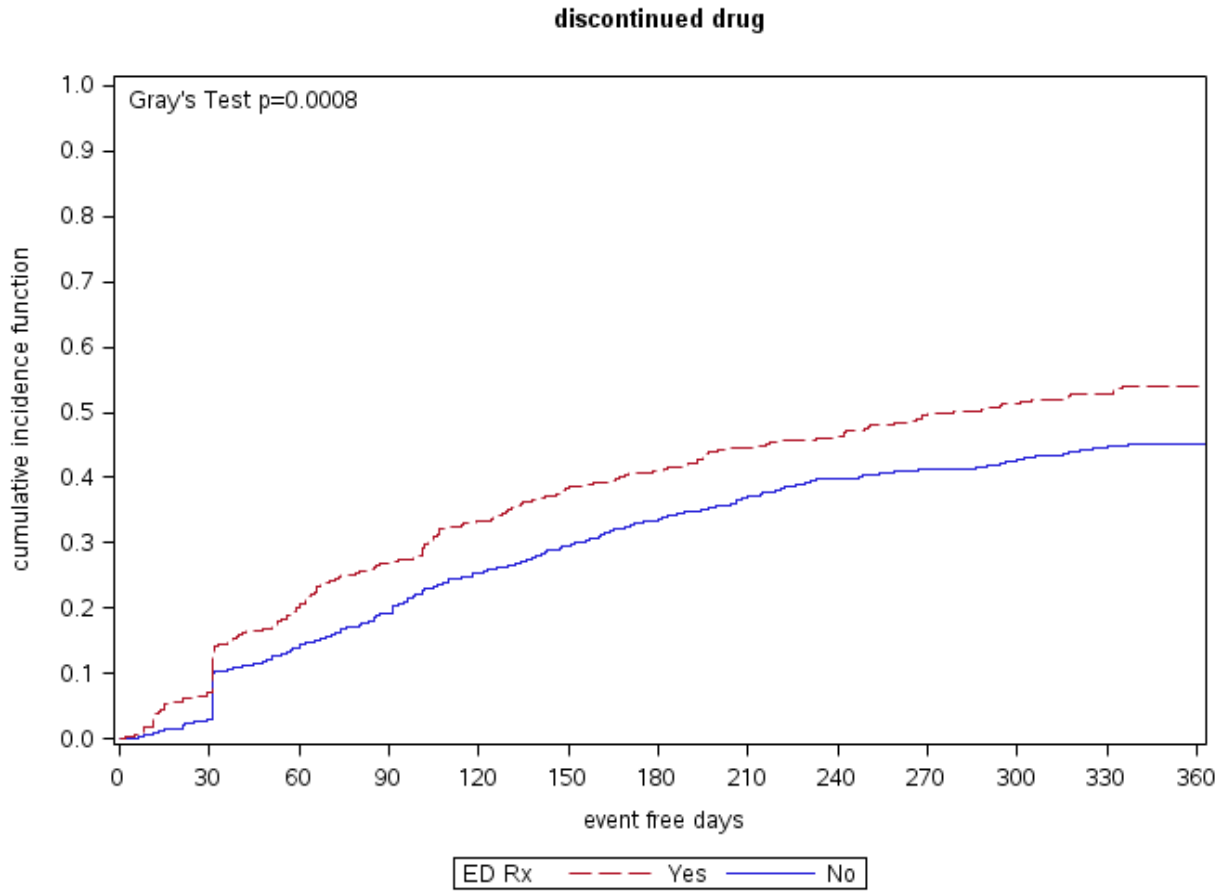

Supplement: 190747-res-1-at.pdf [file 190747-res-1-at.pdf]
